# Supplementary material
Source: PubMed Central journal article supplement (PMC1955530)
Supplement: heart_93_5_639__1.pdf [file heart_93_5_639__1.pdf]

## **Additional References for Online Publication**

### **Books**

Transcatheter Valve Repair. Eds. Hijazi Z, Bonhoeffer P, Ruiz C. *Taylor Francis, London*. 2006; 165-174.

### **Papers**

Al Zaibag M, Ribeiro P, Al Kasab S. Percutaneous balloon valvotomy in tricuspid stenosis. *Br Heart J*. 1987 Jan;57(1):51-3.

Attmann T, Jahnke T, Quaden R, Boening A, Muller-Hulsbeck S, Cremer J, Lutter G. Advances in experimental percutaneous pulmonary valve replacement. *Ann Thorac Surg*. 2005;80(3):969-75.

Bashore TM, Davidson CJ. Follow-up recatheterization after balloon aortic valvuloplasty. Mansfield Scientific Aortic Valvuloplasty Registry Investigators. *J Am Coll Cardiol*. 1991;17(5):1188-95.

Ben Farhat M, Ayari M, Maatouk F, Betbout F, Gamra H, Jarra M, Tiss M, Hammami S, Thaalbi R, Addad F. Percutaneous balloon versus surgical closed and open mitral commissurotomy: seven-year follow-up results of a randomized trial. *Circulation*. 1998 Jan 27;97(3):245-50.

Berland J, Cribier A, Savin T, Lefebvre E, Koning R, Letac B. Percutaneous balloon valvuloplasty in patients with severe aortic stenosis and low ejection fraction. Immediate results and 1-year follow-up. *Circulation*. 1989;79(6):1189-96.

Bernard Y, Etievent J, Mourand JL, Anguenot T, Schiele F, Guseibat M, Bassand JP. Long-term results of percutaneous aortic valvuloplasty compared with aortic valve replacement in patients more than 75 years old. *J Am Coll Cardiol*. 1992;20(4):796-801.

Bonhoeffer P, Boudjemline Y, Qureshi SA, Le Bidois J, Iserin L, Acar P, Merckx J, Kachaner J, Sidi D. Percutaneous insertion of the pulmonary valve. *J Am Coll Cardiol*. 2002;39(10):1664-9.

Boudjemline Y, Schievano S, Bonnet C, Coats L, Agnoletti G, Khambadkone S, Bonnet D, Deanfield J, Sidi D, Bonhoeffer P. Off-pump replacement of the pulmonary valve in large right ventricular outflow tracts: A hybrid approach. *J Thorac Cardiovasc Surg* 2005;129:831-7

Boudjemline Y, Agnoletti G, Piechaud JF, Iserin L, Vouhe P, Bonnet D, Sidi D, Bonhoeffer P. [Percutaneous pulmonary valve replacement: towards a modification of the prosthesis] *Arch Mal Coeur Vaiss*. 2003;96(5):461-6. French.

Boudjemline Y, Pineau E, Borenstein N, Behr L, Bonhoeffer P. New insights in minimally invasive valve replacement: description of a cooperative approach for the off-pump replacement of mitral valves. *Eur Heart J*. 2005 Oct; 26(19):2013-7.

Boudjemline Y, Laborde F, Pineau E, Mollet A, Abadir S, Borenstein N, Behr L, Bonhoeffer

P. Expandable right ventricular-to-pulmonary artery conduit: an animal study. *Pediatr Res.* 2006 Jun;59(6):773-7.

Byrne MJ, Kaye DM, Mathis M, Reuter DG, Alferness CA, Power JM. Percutaneous mitral annular reduction provides continued benefit in an ovine model of dilated cardiomyopathy. *Circulation.* 2004;110(19):3088-92.

Chen CR, Cheng TO, Huang T, Zhou YL, Chen JY, Huang YG, Li HJ. Percutaneous balloon valvuloplasty for pulmonic stenosis in adolescents and adults. *N Engl J Med.* 1996;335(1):21-5.

Coats L, Tsang VT, Khambadkone S, van Doorn C, Cullen, Deanfield J, de Leval M, Bonhoeffer P. The Potential Impact Of Percutaneous Pulmonary Valve Stent Implantation On Right Ventricular Outflow Tract Re-Intervention. *Eur J Cardiothorac Surg.* 2005;27(4):536-43.

Cohn LH. Percutaneous mitral valve repair with the edge-to-edge technique: a surgeon's perspective. *J Am Coll Cardiol.* 2005;46(11):2141-2

Condado JA, Acquatella H, Rodriguez L, Whitlow P, Velez-Gimo M, St Goar FG. Percutaneous edge-to-edge mitral valve repair: 2-year follow-up in the first human case. *Catheter Cardiovasc Interv.* 2006;67(2):323-5.

Cribier A, Savin T, Saoudi N, Rocha P, Berland J, Letac B. Percutaneous transluminal valvuloplasty of acquired aortic stenosis in elderly patients: an alternative to valve replacement? *Lancet.* 1986;1(8472):63-7.

Cribier A, Eltchaninoff H, Tron C, Bauer F, Agatiello C, Sebah L, Bash A, Nusimovici D, Litzler PY, Bessou JP, Leon MB. Early experience with percutaneous transcatheter implantation of heart valve prosthesis for the treatment of end-stage inoperable patients with calcific aortic stenosis. *J Am Coll Cardiol.* 2004;43(4):698-703.

Dang NC, Aboodi MS, Sakaguchi T, Wasserman HS, Argenziano M, Cosgrove DM, Rosengart TK, Feldman T, Block PC, Oz MC. Surgical revision after percutaneous mitral valve repair with a clip: initial multicenter experience. *Ann Thorac Surg.* 2005; 80(6):2338-42.

Ferrari M, Figulla HR, Schlosser M, Tenner I, Frerichs I, Damm C, Guyenot V, Werner GS, Hellige G. Transarterial aortic valve replacement with a self expanding stent in pigs. *Heart.* 2004;90(11):1326-31.

Fann JJ, St Goar FG, Komtebedde J, Oz MC, Block PC, Foster E, Butany J, Feldman T, Burdon TA. Beating heart catheter-based edge-to-edge mitral valve procedure in a porcine model: efficacy and healing response. *Circulation.* 2004;110(8):988-93.

Fogelman R, Nykanen D, Smallhorn JF, McCrindle BW, Freedom RM, Benson LN. Endovascular stents in the pulmonary circulation. Clinical impact on management and medium-term follow-up. *Circulation.* 1995 Aug 15;92(4):881-5.

Hernandez R, Banuelos C, Alfonso F, Goicolea J, Fernandez-Ortiz A, Escaned J, Azcona L,

Almeria C, Macaya C. Long-term clinical and echocardiographic follow-up after percutaneous mitral valvuloplasty with the Inoue balloon. *Circulation*. 1999 Mar 30;99(12):1580-6.

Iung B, Garbarz E, Michaud P, Helou S, Farah B, Berdah P, Michel PL, Cormier B, Vahanian A. Late results of percutaneous mitral commissurotomy in a series of 1024 patients. Analysis of late clinical deterioration: frequency, anatomic findings, and predictive factors. *Circulation*. 1999;99(25):3272-8.

Lieberman EB, Bashore TM, Hermiller JB, Wilson JS, Pieper KS, Keeler GP, Pierce CH, Kisslo KB, Harrison JK, Davidson CJ. Balloon aortic valvuloplasty in adults: failure of procedure to improve long-term survival. *J Am Coll Cardiol*. 1995;26(6):1522-8.

Moreno PR, Jang IK, Newell JB, Block PC, Palacios IF. The role of percutaneous aortic balloon valvuloplasty in patients with cardiogenic shock and critical aortic stenosis. *J Am Coll Cardiol*. 1994;23(5):1071-5.

O'Connor BK, Beekman RH, Rocchini AP, Rosenthal A. Intermediate-term effectiveness of balloon valvuloplasty for congenital aortic stenosis. A prospective follow-up study. *Circulation*. 1991;84(2):732-8.

O'Neill WW. Predictors of long-term survival after percutaneous aortic valvuloplasty: report of the Mansfield Scientific Balloon Aortic Valvuloplasty Registry. *J Am Coll Cardiol*. 1991;17(1):193-8.

Pavcnik D, Wright KC, Wallace S. Development and initial experimental evaluation of a prosthetic aortic valve for transcatheter placement. Work in progress. *Radiology*. 1992;183(1):151-4.

Powell AJ, Lock JE, Keane JF, Perry SB. Prolongation of RV-PA conduit life span by percutaneous stent implantation. Intermediate-term results. *Circulation*. 1995 Dec 1;92(11):3282-8.

Quaden R, Attmann T, Boening A, Cremer J, Lutter G. Percutaneous aortic valve replacement: resection before implantation. *Eur J Cardiothorac Surg*. 2005;27(5):836-40.

Rocchini AP, Kveselis DA, Crowley D, Dick M, Rosenthal A. Percutaneous balloon valvuloplasty for treatment of congenital pulmonary valvular stenosis in children. *J Am Coll Cardiol*. 1984;3(4):1005-12.

Ruiz CE, Iemura M, Medie S, Varga P, Van Alstine WG, Mack S, Deligio A, Fearnot N, Beier UH, Pavcnik D, Hijazi ZM, Kiupel M. Transcatheter placement of a low-profile biodegradable pulmonary valve made of small intestinal submucosa: a long-term study in a swine model. *J Thorac Cardiovasc Surg*. 2005;130(2):477-84.

Webb JG, Munt B, Makkar RR, Naqvi TZ, Dang N. Percutaneous stent-mounted valve for treatment of aortic or pulmonary valve disease. *Catheter Cardiovasc Interv*. 2004 ;63(1):89-93.

Webb JG, Chandavimol M, Thompson CR, Ricci DR, Carere RG, Munt BI, Buller CE,

Pasupati S, Lichtenstein S. Percutaneous Aortic Valve Implantation Retrograde From the Femoral Artery. *Circulation*. 2006 Feb 6; [Epub ahead of print]

Vassiliades TA Jr, Block PC, Cohn LH, Adams DH, Borer JS, Feldman T, Holmes DR, Laskey WK, Lytle BW, Mack MJ, Williams DO. The clinical development of percutaneous heart valve technology: a position statement of the Society of Thoracic Surgeons (STS), the American Association for Thoracic Surgery (AATS), and the Society for Cardiovascular Angiography and Interventions (SCAI) Endorsed by the American College of Cardiology Foundation (ACCF) and the American Heart Association (AHA). *J Am Coll Cardiol*. 2005;45(9):1554-60.
